# Supplementary material
Source: HighWire-hosted journal article supplement (https://bmjopen.bmj.com/content/10/7/e028968)
Supplement: inline-supplementary-material-1 [file inline-supplementary-material-1.pdf]

Supplementary table 1. Association of 2h-post load glucose and HbA1c with HBsAg seropositivity and HBsAb seropositivity in Guangzhou Biobank Cohort Study

|                             | 2h-post load glucose               |         | HbA1c                              |         |
|-----------------------------|------------------------------------|---------|------------------------------------|---------|
|                             | $\beta$ (95% confidence interval ) | P-value | $\beta$ (95% confidence interval ) | P-value |
| <b>HBsAg seropositivity</b> |                                    |         |                                    |         |
| Crude model                 | -0.04 (-0.29, 0.21)                | 0.76    | -0.01 (-0.07, 0.06)                | 0.83    |
| Model                       | -0.04 (-0.29, 0.21)                | 0.74    | 0.00 (-0.07, 0.06)                 | 0.88    |
| Model 2                     | 0.00 (-0.24, 0.25)                 | 0.98    | -0.02 (-0.08, 0.05)                | 0.64    |
| <b>HBsAb seropositivity</b> |                                    |         |                                    |         |
| Crude model                 | -0.12 (-0.29, 0.05)                | 0.15    | -0.02 (-0.06, 0.03)                | 0.49    |
| Model 1                     | -0.12 (-0.28, 0.05)                | 0.17    | -0.02 (-0.06, 0.03)                | 0.44    |
| Model 2                     | -0.13 (-0.30, 0.03)                | 0.11    | -0.02 (-0.06, 0.03)                | 0.48    |

Model 1: adjusting for age and sex

Model 2: additionally adjusting for education, occupation, smoking status, alcohol use, physical activity, BMI and study sample source, as appropriate

Supplementary table 2. Fasting glucose and diabetes status by HBsAg serological status (HBsAg positive *versus* negative) using different diabetes diagnostic criteria in Guangzhou Biobank Cohort Study

|                                       | <b>Criteria 1</b>                  |                | <b>Criteria 2</b>                  |                | <b>Criteria 3</b>                  |                |
|---------------------------------------|------------------------------------|----------------|------------------------------------|----------------|------------------------------------|----------------|
| <b>Fasting glucose, mmol/l</b>        | <b><math>\beta</math> (95% CI)</b> | <b>P-value</b> | <b><math>\beta</math> (95% CI)</b> | <b>P-value</b> | <b><math>\beta</math> (95% CI)</b> | <b>P-value</b> |
| Crude model                           | -0.02 (-0.10, 0.06)                | 0.68           | -0.02 (-0.10, 0.07)                | 0.68           | -0.03 (-0.13, 0.07)                | 0.54           |
| Model 1                               | -0.02 (-0.10, 0.06)                | 0.65           | -0.02 (-0.10, 0.06)                | 0.66           | -0.04 (-0.13, 0.06)                | 0.48           |
| Model 2                               | -0.01 (-0.09, 0.07)                | 0.86           | -0.01 (-0.09, 0.08)                | 0.88           | -0.03 (-0.13, 0.07)                | 0.56           |
| <b>Diabetes, yes <i>versus</i> no</b> | <b>OR (95%CI)</b>                  |                | <b>OR (95%CI)</b>                  |                | <b>OR (95%CI)</b>                  |                |
| Crude model                           | 0.92 (0.44, 1.90)                  | 0.82           | 1.05 (0.70, 1.57)                  | 0.83           | 0.90 (0.43, 1.89)                  | 0.79           |
| Model 1                               | 0.91 (0.44, 1.89)                  | 0.81           | 1.05 (0.70, 1.58)                  | 0.82           | 0.90 (0.43, 1.88)                  | 0.77           |
| Model 2                               | 0.97 (0.47, 2.03)                  | 0.94           | 1.12 (0.74, 1.69)                  | 0.60           | 0.94 (0.44, 1.99)                  | 0.87           |

Criteria 1: Fasting glucose  $\geq 7.0$ mmol/l or self-reported diabetes

Criteria 2: Fasting glucose  $\geq 7.0$ mmol/l, 2h-post load glucose  $\geq 11.1$ mmol/l, or self-reported diabetes

Criteria 3: Fasting glucose  $\geq 7.0$ mmol/l, 2h-post load glucose  $\geq 11.1$ mmol/l, HbA1c  $\geq 6.5\%$ , or self-reported diabetes

Model 1: adjusting for age and sex

Model 2: additionally adjusting for education, occupation, smoking status, alcohol use, physical activity, BMI, and study sample source, as appropriate

Supplementary table 3. Fasting glucose and diabetes status by HBsAb serological status (HBsAb positive *versus* negative) using different diabetes diagnostic criteria in Guangzhou Biobank Cohort Study

|                                       | <b>Criteria 1</b>   |                | <b>Criteria 2</b>   |                | <b>Criteria 3</b>   |                |
|---------------------------------------|---------------------|----------------|---------------------|----------------|---------------------|----------------|
| <b>Fasting glucose, mmol/l</b>        | <b>β (95% CI)</b>   | <b>P-value</b> | <b>β (95% CI)</b>   | <b>P-value</b> | <b>β (95% CI)</b>   | <b>P-value</b> |
| Crude model                           | -0.01 (-0.06, 0.05) | 0.83           | -0.01 (-0.06, 0.05) | 0.83           | -0.00 (-0.07, 0.07) | 0.92           |
| Model 1                               | -0.01 (-0.06, 0.05) | 0.84           | -0.01 (-0.06, 0.05) | 0.83           | -0.00 (-0.07, 0.07) | 0.99           |
| Model 2                               | -0.01 (-0.06, 0.05) | 0.84           | -0.01 (-0.06, 0.05) | 0.84           | -0.01 (-0.08, 0.06) | 0.86           |
| <b>Diabetes, yes <i>versus</i> no</b> | <b>OR (95%CI)</b>   |                | <b>OR (95%CI)</b>   |                | <b>OR (95%CI)</b>   |                |
| Crude model                           | 0.87 (0.55, 1.36)   | 0.53           | 0.88 (0.67, 1.15)   | 0.34           | 0.78 (0.49, 1.25)   | 0.31           |
| Model 1                               | 0.87 (0.56, 1.36)   | 0.55           | 0.88 (0.68, 1.15)   | 0.35           | 0.79 (0.49, 1.26)   | 0.32           |
| Model 2                               | 0.85 (0.54, 1.35)   | 0.49           | 0.85 (0.65, 1.12)   | 0.24           | 0.76 (0.47, 1.22)   | 0.25           |

Criteria 1: Fasting glucose  $\geq 7.0$ mmol/l or self-reported diabetes

Criteria 2: Fasting glucose  $\geq 7.0$ mmol/l, 2h-post load glucose  $\geq 11.1$ mmol/l, or self-reported diabetes

Criteria 3: Fasting glucose  $\geq 7.0$ mmol/l, 2h-post load glucose  $\geq 11.1$ mmol/l, HbA1c  $\geq 6.5\%$ , or self-reported diabetes

Model 1: adjusting for age and sex

Model 2: additionally adjusting for education, occupation, smoking status, alcohol use, physical activity, BMI and study sample source, as appropriate

Supplementary table 4. Fasting glucose and diabetes status by HBsAg and HBsAb serological status in GBCS and MIDPC

|                                | GBCS                 |                        |         |                        | MIDPC   |                        |         |                       |         |
|--------------------------------|----------------------|------------------------|---------|------------------------|---------|------------------------|---------|-----------------------|---------|
|                                | HBsAg(-)<br>HBsAb(-) | HBsAg(+)<br>HBsAb(-)   | P-value | HBsAg(-)<br>HBsAb(+)   | P-value | HBsAg(+)<br>HBsAb(-)   | P-value | HBsAg(-)<br>HBsAb(+)  | P-value |
| <b>Fasting glucose, mmol/l</b> | <b>Reference</b>     | <b>β (95% CI)</b>      |         | <b>β (95% CI)</b>      |         | <b>β (95% CI)</b>      |         | <b>β (95% CI)</b>     |         |
| Crude model                    | 0.00                 | -0.04<br>(-0.15, 0.07) | 0.49    | -0.02<br>(-0.08, 0.05) | 0.60    | 0.02<br>(-0.24, 0.29)  | 0.86    | 0.04<br>(-0.08, 0.17) | 0.52    |
| Model 1                        | 0.00                 | -0.04<br>(-0.15, 0.07) | 0.47    | -0.02<br>(-0.08, 0.05) | 0.59    | 0.04<br>(-0.23, 0.31)  | 0.77    | 0.04<br>(-0.09, 0.17) | 0.54    |
| Model 2                        | 0.00                 | -0.01<br>(-0.12, 0.09) | 0.81    | -0.01<br>(-0.07, 0.05) | 0.77    | -0.04<br>(-0.36, 0.27) | 0.78    | 0.07<br>(-0.07, 0.21) | 0.32    |
| <b>Diabetes, yes versus no</b> | <b>Reference</b>     | <b>OR (95%CI)</b>      |         | <b>OR (95%CI)</b>      |         | <b>OR (95%CI)</b>      |         | <b>OR (95%CI)</b>     |         |
| Crude model                    | 1.00                 | 0.89<br>(0.52, 1.52)   | 0.68    | 0.85<br>(0.63, 1.14)   | 0.28    | 0.91<br>(0.67, 1.23)   | 0.54    | 0.95<br>(0.83, 1.10)  | 0.28    |
| Model 1                        | 1.00                 | 0.88<br>(0.52, 1.52)   | 0.66    | 0.85<br>(0.63, 1.15)   | 0.29    | 0.91<br>(0.67, 1.23)   | 0.52    | 0.95<br>(0.82, 1.09)  | 0.45    |
| Model 2                        | 1.00                 | 0.95<br>(0.55, 1.64)   | 0.85    | 0.84<br>(0.61, 1.13)   | 0.24    | 0.82<br>(0.57, 1.18)   | 0.29    | 0.97<br>(0.83, 1.14)  | 0.72    |

Model 1: adjusting for age and sex

Model 2: additionally adjusting for education, occupation, smoking status, alcohol use, physical activity, BMI and study sample source, as appropriate

Supplementary table 5. Fasting glucose and diabetes status by HBsAg and HBsAb serological status in data with GBCS and MIDPC pooling together

|                                | GBCS+MIDPC        |                     |          |                |                    |          |
|--------------------------------|-------------------|---------------------|----------|----------------|--------------------|----------|
|                                | HBsAg(-) HBsAb(-) | HBsAg(+)            | HBsAb(-) |                | HBsAg(-)           | HBsAb(+) |
| <b>Fasting glucose, mmol/l</b> | <b>Reference</b>  | <b>β (95% CI)</b>   |          | <b>P-value</b> | <b>β (95% CI)</b>  |          |
| Crude model                    | 0.00              | -0.00 (-0.14, 0.14) |          | 0.98           | 0.02 (-0.06, 0.09) |          |
| Model 1                        | 0.00              | 0.01 (-0.13, 0.15)  |          | 0.93           | 0.02 (-0.05, 0.09) |          |
| Model 2                        | 0.00              | -0.01 (-0.15, 0.14) |          | 0.92           | 0.04 (-0.04, 0.11) |          |
| <b>Diabetes, yes versus no</b> | <b>Reference</b>  | <b>OR (95%CI)</b>   |          |                | <b>OR (95%CI)</b>  |          |
| Crude model                    | 1.00              | 0.91 (0.70, 1.19)   |          | 0.49           | 0.93 (0.82, 1.06)  |          |
| Model 1                        | 1.00              | 0.92 (0.70, 1.19)   |          | 0.52           | 0.93 (0.82, 1.06)  |          |
| Model 2                        | 1.00              | 0.87 (0.65, 1.18)   |          | 0.39           | 0.96 (0.83, 1.11)  |          |

Model 1: adjusting for age and sex

Model 2: additionally adjusting for education, occupation, smoking status, alcohol use, physical activity, BMI and study sample source, as appropriate
